# Supplementary material for: Intercalated graphitic carbon nitride: a fascinating two-dimensional nanomaterial for an ultra-sensitive humidity nanosensor
Source: Royal Society of Chemistry journal article supplement (doi:10.1039/c4nr01570c), 2014-06-05
Supplement: c4nr01570c1.pdf [file c4nr01570c1.pdf]

## Supporting Information

### Intercalated Graphitic Carbon Nitride: A Fascinating Two-Dimensional Nanomaterials for Ultra-Sensitive Humidity Nanosensor

Zhenyi Zhang, Jindou Huang, Qing Yuan, and Bin Dong\*

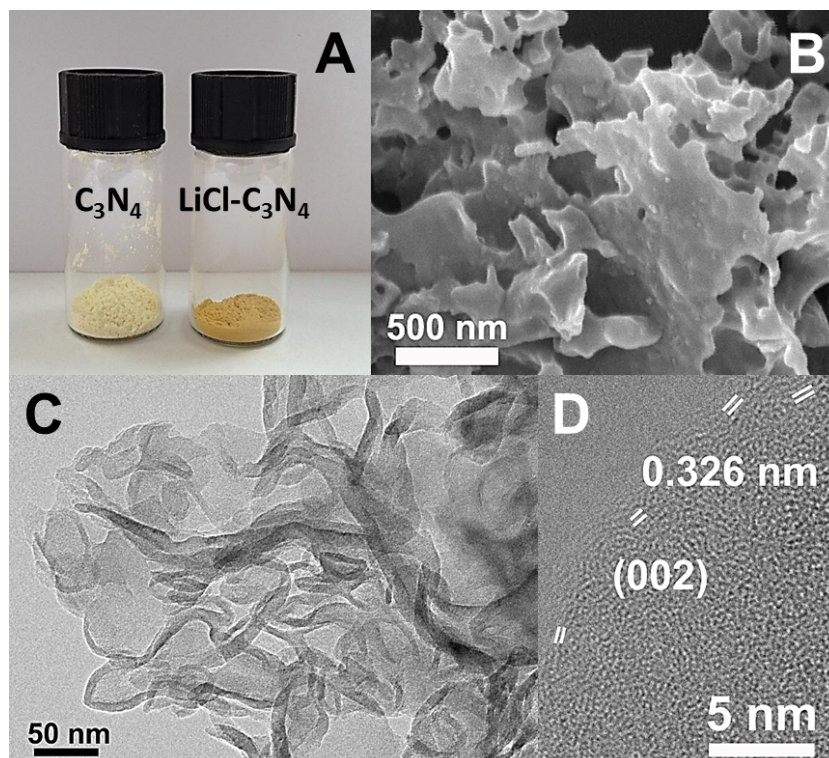

**Figure S1.** (A) Optical images of g-C<sub>3</sub>N<sub>4</sub> nanosheets and 3.0 wt.% LiCl-intercalated g-C<sub>3</sub>N<sub>4</sub> nanosheets; (B) SEM image of g-C<sub>3</sub>N<sub>4</sub> nanosheets; (C) TEM image of g-C<sub>3</sub>N<sub>4</sub> nanosheets; (D)

HRTEM image of g-C<sub>3</sub>N<sub>4</sub> nanosheets.

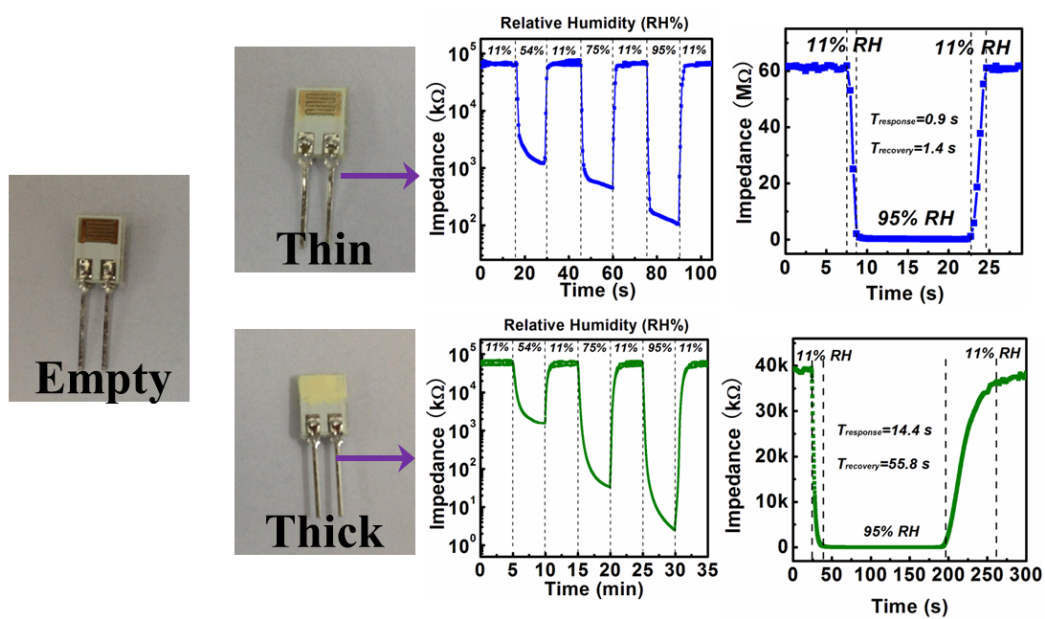

**Figure S2.** The optical images and the humidity sensing curves of the nanosensors with different thickness of LICN.

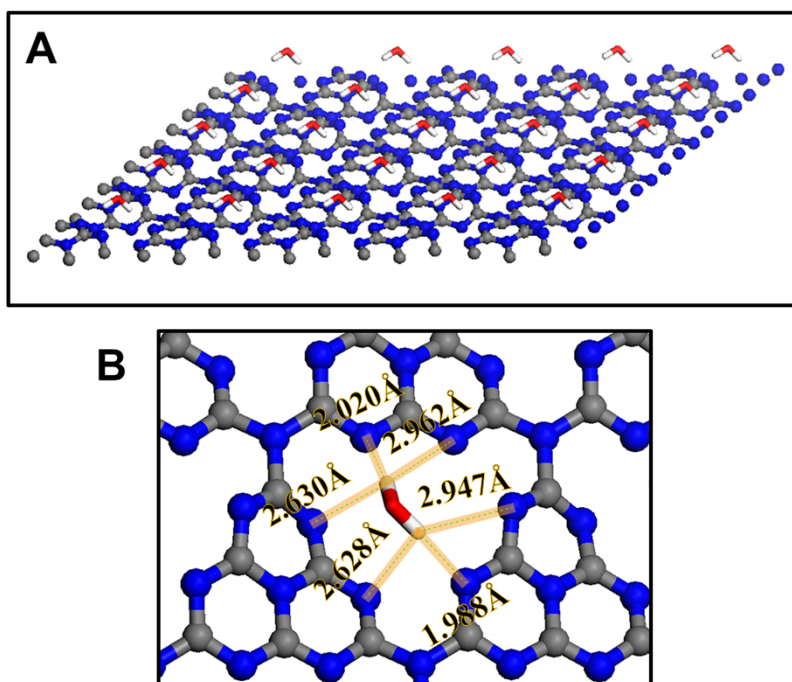

**Figure S3.** (A) Surface structure of the g-C<sub>3</sub>N<sub>4</sub> nanosheets after absorbing water; (B) the interaction between the water and the “nitrogen pots” of g-C<sub>3</sub>N<sub>4</sub> nanosheets.

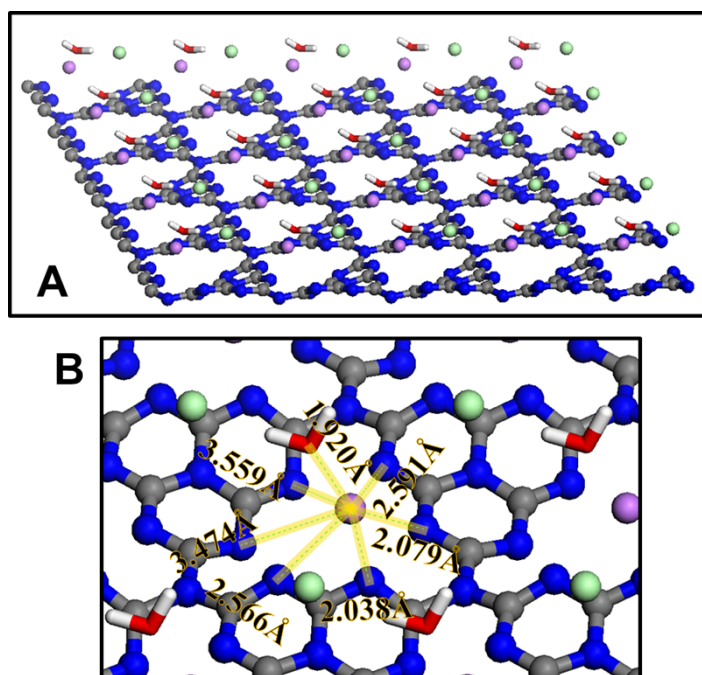

**Figure S4.** (A) Surface structure of the LiCl-intercalated g-C<sub>3</sub>N<sub>4</sub> nanosheets after absorbing water; (B) the interaction between the water and the Li species around the “nitrogen pots” of LiCl-intercalated g-C<sub>3</sub>N<sub>4</sub> nanosheets.

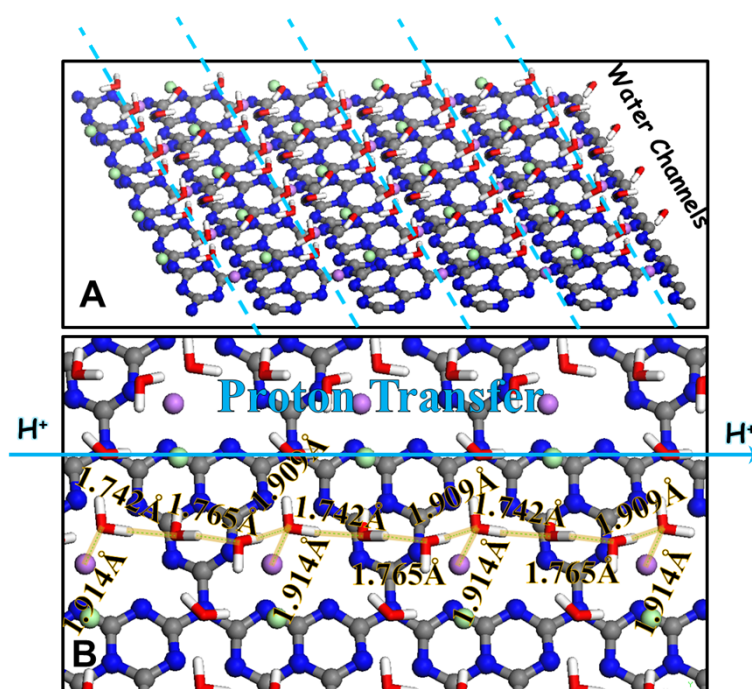

**Figure S5.** (A) Surface structure of the LiCl-intercalated g-C<sub>3</sub>N<sub>4</sub> nanosheets after absorbing water channels; (B) the interactions of water molecules in one water channel.

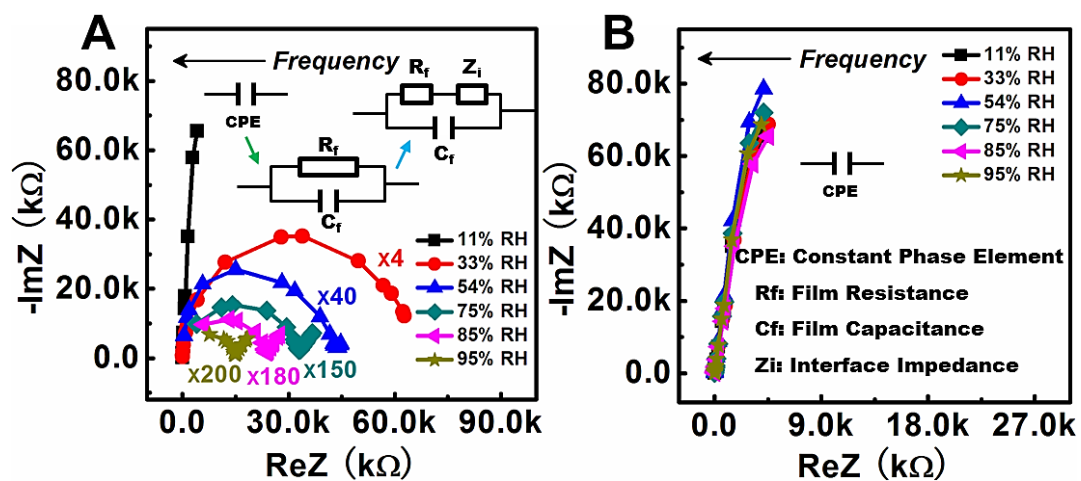

**Figure S6.** Complex impedance plots of the as-fabricated nanosensors based on (A) 3.0 wt.% LiCl-intercalated  $g\text{-C}_3\text{N}_4$  nanosheets and (B)  $g\text{-C}_3\text{N}_4$  nanosheets at different relative humidity.

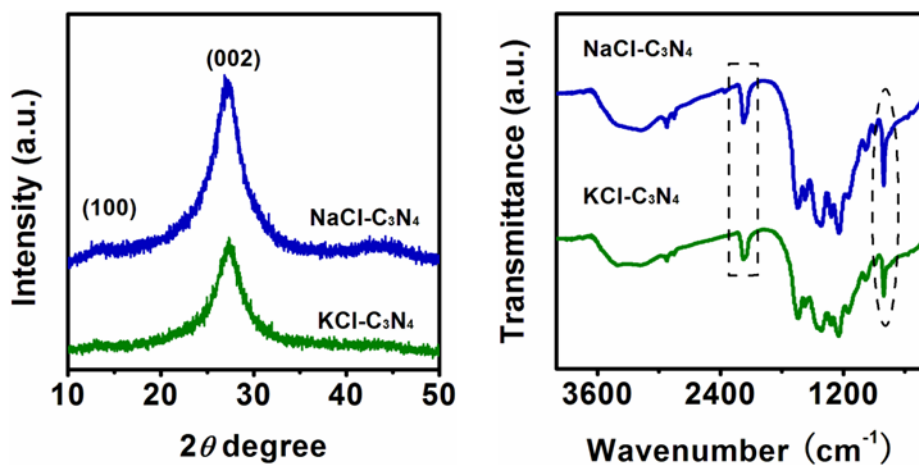

**Figure S7.** XRD patterns and FT-IR spectra of the NaCl- or KCl- intercalated C<sub>3</sub>N<sub>4</sub> nanosheets. The results are similar with these of LiCl-C<sub>3</sub>N<sub>4</sub> nanosheets, indicating the formation of NaCl- and KCl- intercalated C<sub>3</sub>N<sub>4</sub> nanosheets, respectively.

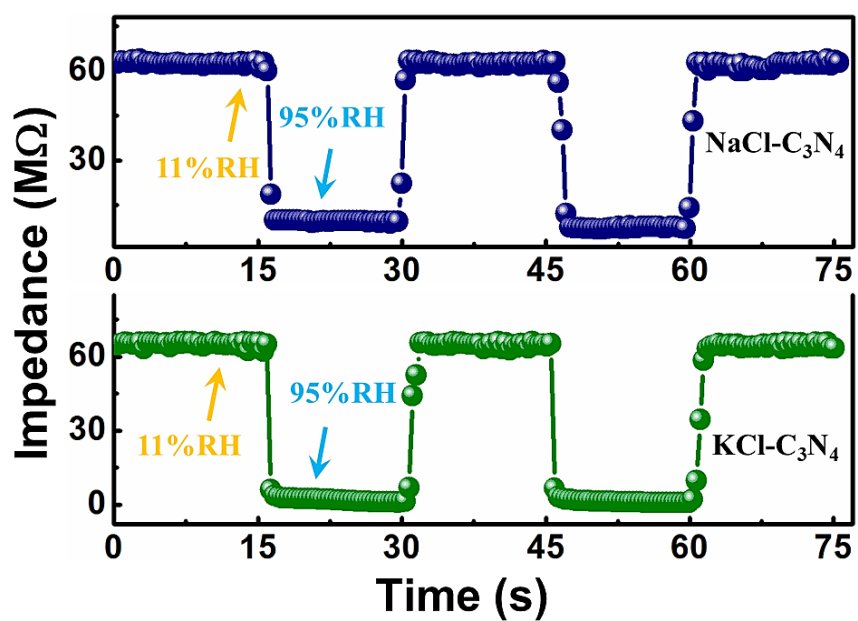

**Figure S8.** Response and recovery characteristic curves of the nanosensors based on NaCl-intercalated g-C<sub>3</sub>N<sub>4</sub> nanosheets and KCl-intercalated g-C<sub>3</sub>N<sub>4</sub> nanosheets.



**Table S1.** Theoretical calculation results of the surface energy and adsorption energy under different conditions.

|                                                                         | Energy (eV)           | Adsorption Energy <sup>a</sup> (kJ/mol) |
|-------------------------------------------------------------------------|-----------------------|-----------------------------------------|
| <b>H<sub>2</sub>O</b>                                                   | -14.22                |                                         |
| <b>C<sub>3</sub>N<sub>4</sub></b>                                       | -473.53               |                                         |
| <b>H<sub>2</sub>O+C<sub>3</sub>N<sub>4</sub></b>                        | -488.13               | -36.66                                  |
| <b>LiCl/C<sub>3</sub>N<sub>4</sub></b>                                  | -501.40               |                                         |
| <b>H<sub>2</sub>O +LiCl/C<sub>3</sub>N<sub>4</sub></b>                  | -516.11               | -47.28                                  |
| <b>Water channel +<br/>LiCl/C<sub>3</sub>N<sub>4</sub></b> <sup>b</sup> | -560.55               |                                         |
| <b>Hydrogen bond</b> <sup>c</sup>                                       | -0.21 (-20.26 kJ/mol) |                                         |

<sup>a</sup> The adsorption energy was obtained by the equation as follow:  $E_a = E_o - (E_w + E_s)$  where  $E_o$  is the surface energy after absorbing a water molecule;  $E_w$  is the energy of one water molecule in vacuum;  $E_s$  is the surface energy of the sample.

<sup>b</sup> The water channel was consisted of one chemical absorbed water molecule and two physical absorbed water molecules, as shown in Figure 4E.

<sup>c</sup> The energy of hydrogen bond was determined by the following equation:  $E_{H-bond} = [E_{wc} - (E_{oLi} + 3 \times E_{aCN} + 3 \times E_w)]/3$ , where  $E_{wc}$  is the surface energy of LiCl/C<sub>3</sub>N<sub>4</sub> absorbing a water channel;  $E_{oLi}$  is the surface energy of LiCl/C<sub>3</sub>N<sub>4</sub> absorbing a water molecule;  $E_{aCN}$  is the energy of C<sub>3</sub>N<sub>4</sub> for absorbing one water molecule;  $E_w$  is the energy of one water molecule in vacuum.
